# Supplementary material
Source: MDPI journal article supplement (https://www.mdpi.com/2220-9964/10/3/123)
Supplement: s1 [file s1]

## Supplementary materials

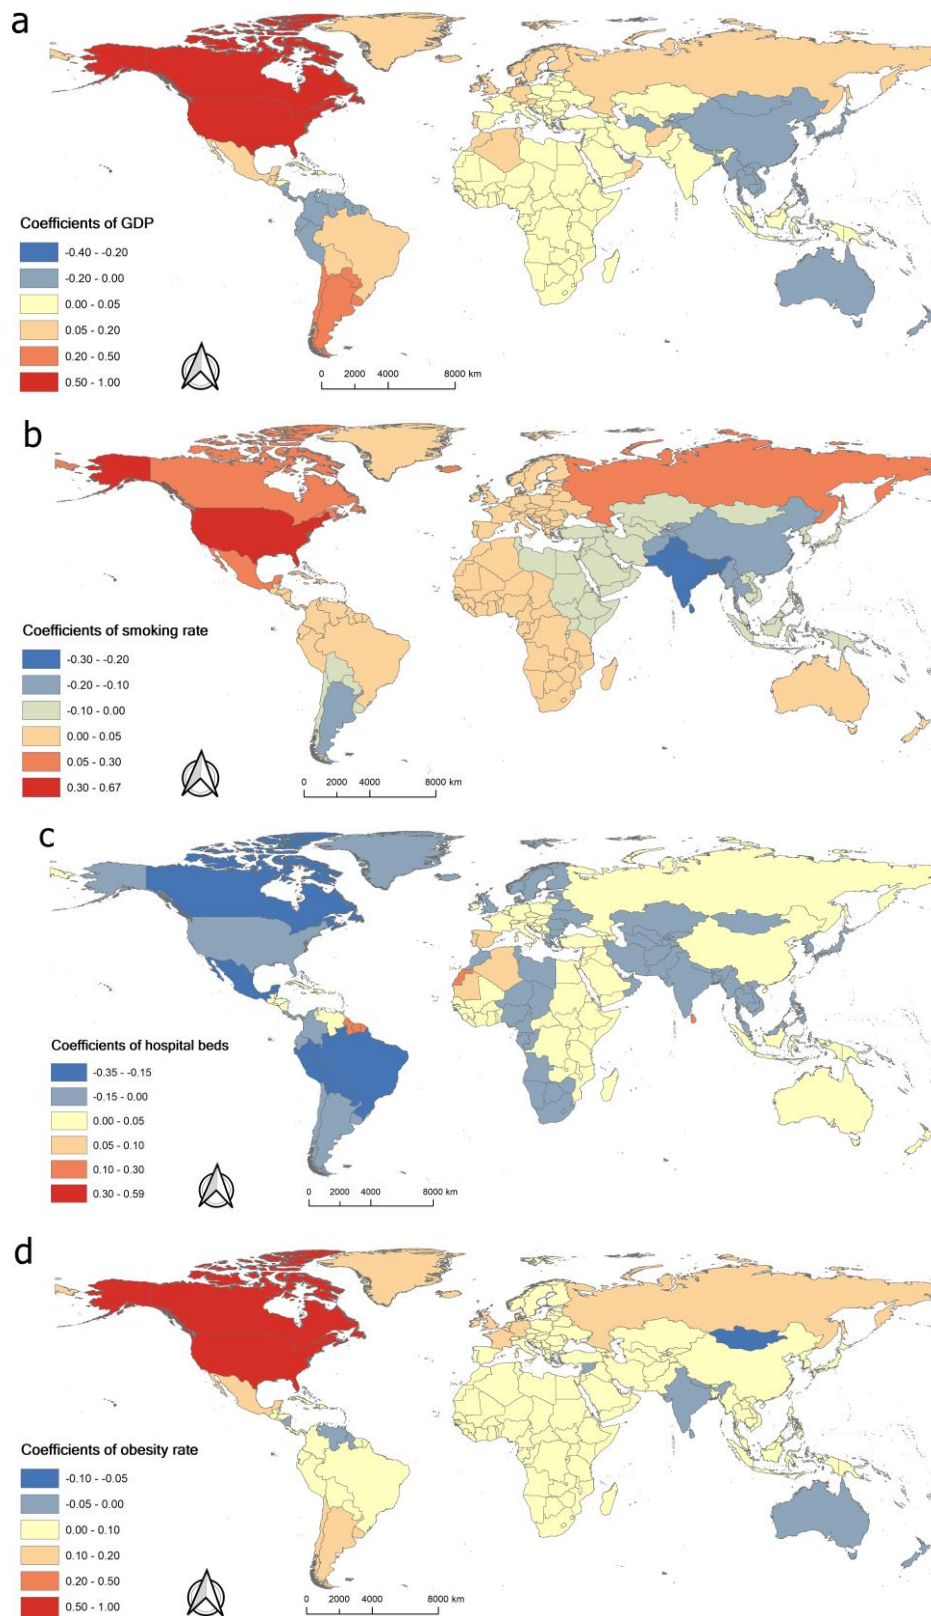

**Figure 1S.** The spatial distribution of the impact of (a) GDP per capita on confirmed cases per million population; (b) smoking rate on confirmed cases per million population; (c) hospital beds on confirmed cases per million population; (d) obesity rate on confirmed cases per million population.

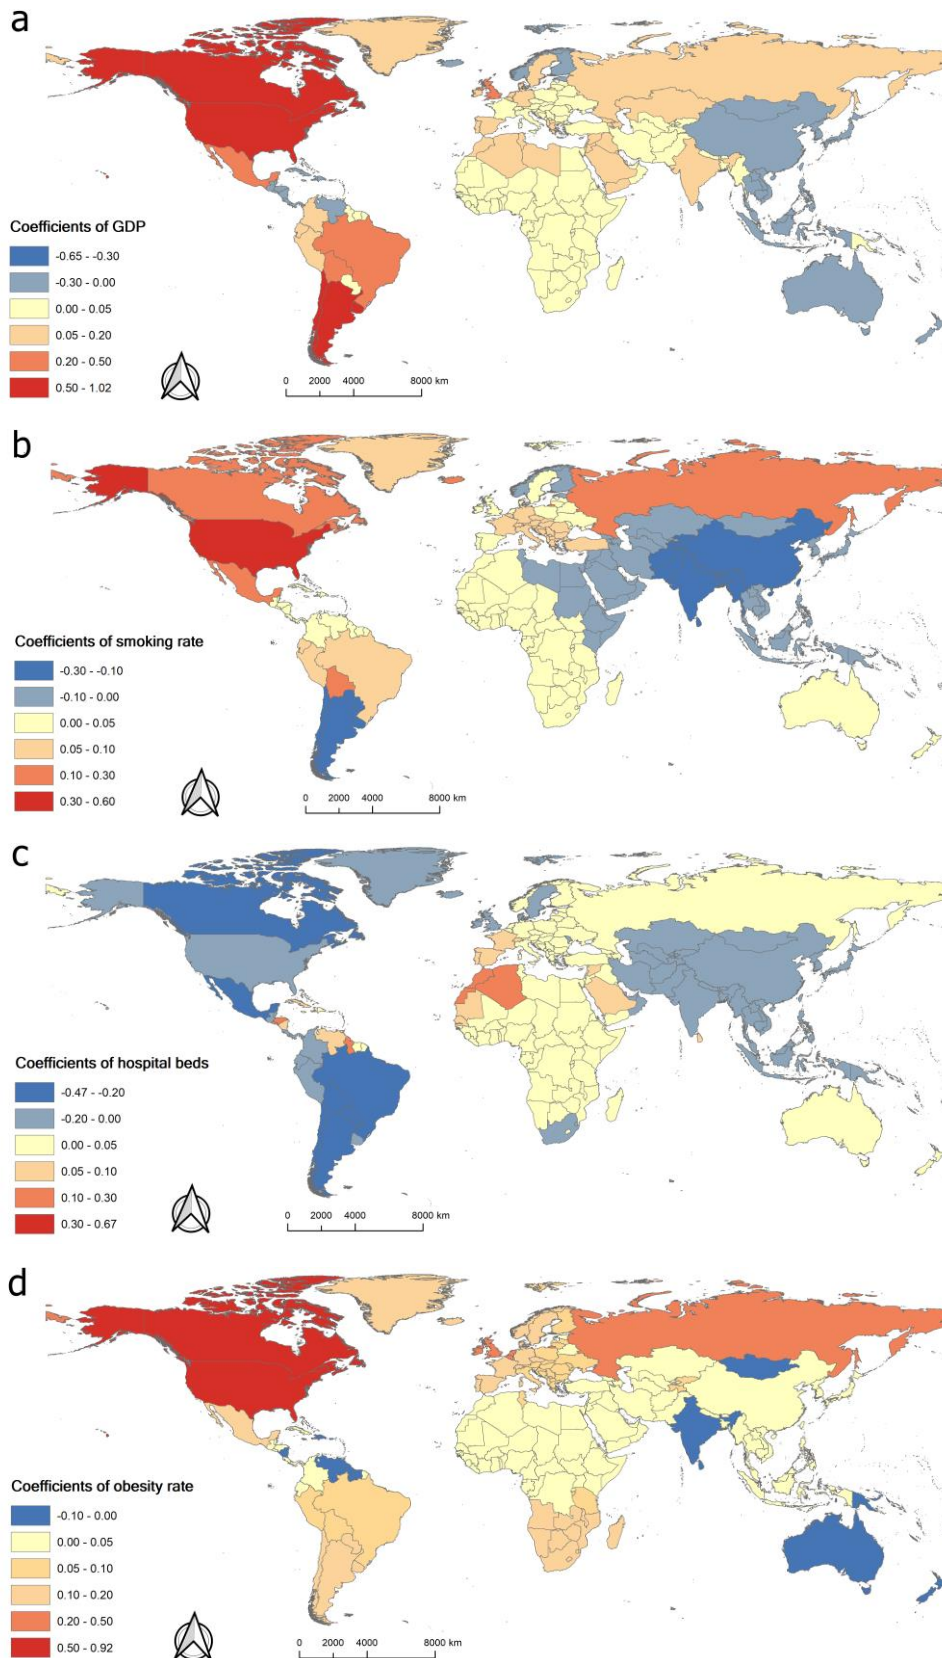

**Figure 2S.** The spatial distribution of the impact of (a) GDP per capita on deaths per million population; (b) smoking rate on deaths per million population; (c) hospital beds on deaths per million population; (d) obesity rate on deaths per million population.
